# Supplementary material for: A machine-learning approach to human ex vivo lung perfusion predicts transplantation outcomes and promotes organ utilization
Source: PubMed Central journal article supplement (PMC10412608; doi:10.1038/s41467-023-40468-7), 2023-08-09
Supplement: 41467_2023_40468_MOESM1_ESM.pdf [file 41467_2023_40468_MOESM1_ESM.pdf]

**Supplementary Information File:**

A machine-learning approach to human ex vivo lung perfusion predicts transplantation outcomes and promotes organ utilization

**Table of Contents:**

**Supplementary Figures.....Page 2**

**Figure 1:** In sighTx model performance on test data

**Figure 2:** Net Benefit of the In sighTx model

**Supplementary Tables.....Page 4**

**Table 1:** Performance (AUROC) of donor and/or recipient models that predict time to extubation in transplanted patients

**Table 2:** Recipient and donor characteristics for In sighTx model assessment

**Table 3:** Summary of the theoretical impact of In sighTx on organ utilization and impression

**Table 4:** Summary of the theoretical transplantation rates by EVLP experience with and without In sighTx

**Table 5:** Summary of source data acquisition for the In sighTx model

**Table 6:** All EVLP features used in the In sighTx model

**Table 7:** Summary of quantitative data derived from EVLP assessment features

**Table 8:** Transplant patient characteristics for In sighTx with recipient features model

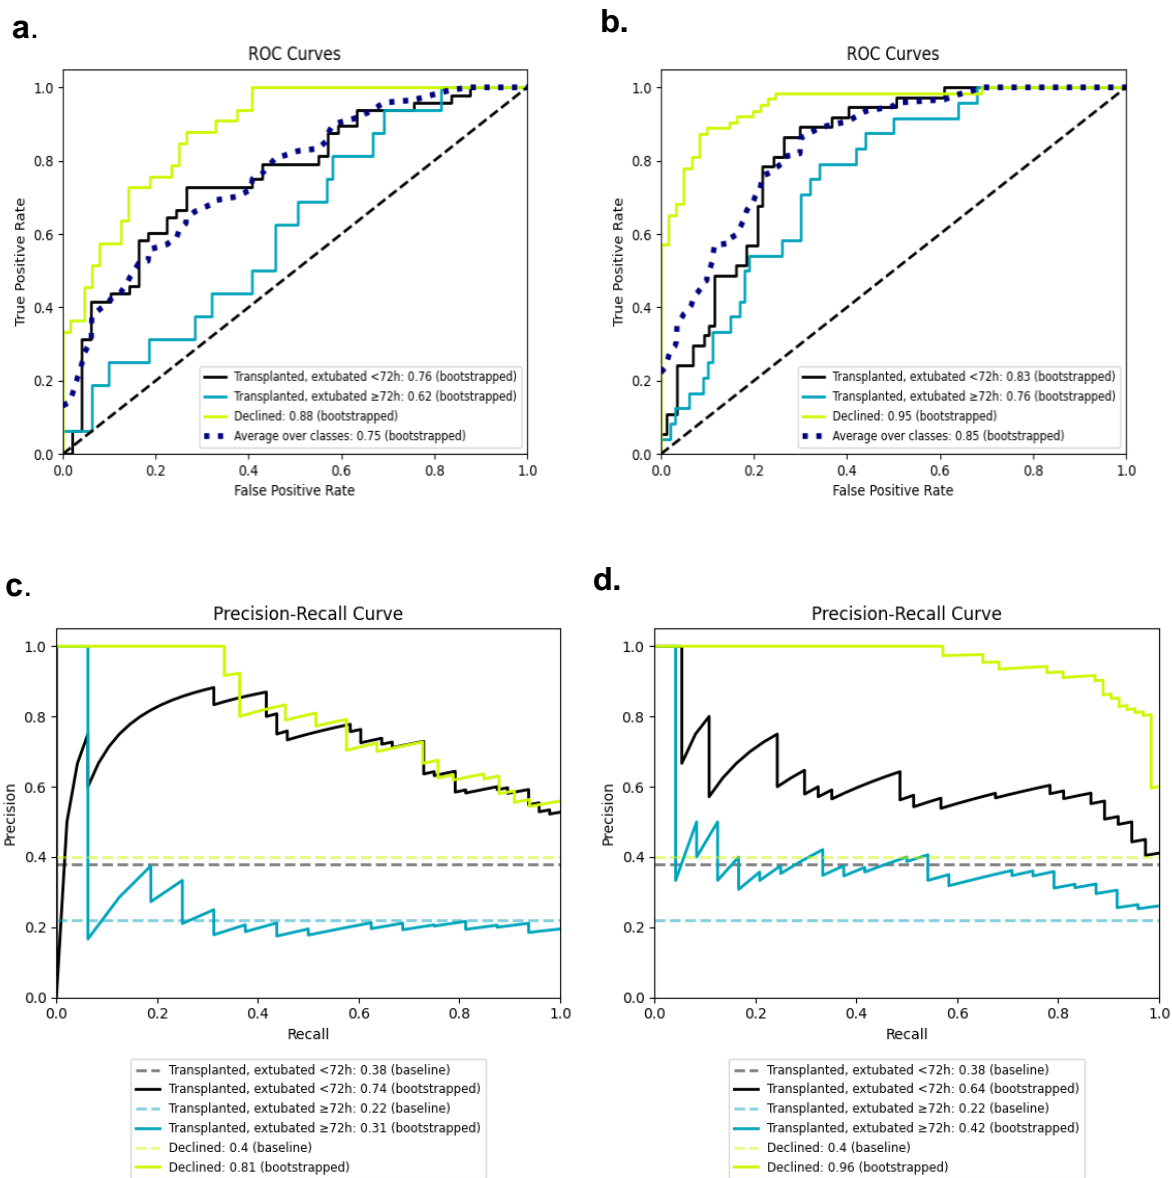

**Supplementary Figure 1: InsignTx model performance on test data.** AUROC graphs for the InsignTx model performance in Test Dataset 1 (a) and Test Dataset 2 (b). Shown are the AUROCs for the overall model (dotted blue line), prediction of post-transplant extubation <72h (black line), ≥72h (blue line), and unsuitable for transplant (yellow line). The dashed line represents an AUROC of 50%. Panel (c) and (d) show the AUPRC graphs for the InsignTx model performance in Test Dataset 1 and Test Dataset 2, respectively. Shown are the AUPRCs for the prediction of post-transplant extubation <72h (black line), ≥72h (blue line), and unsuitable for transplant (yellow line). The dashed lines represent the baseline AUPRC for each outcome. Bootstrapped AUROC and AUPRC values are reported in the respective figure legends. Source data are provided as a Source Data file.

a.

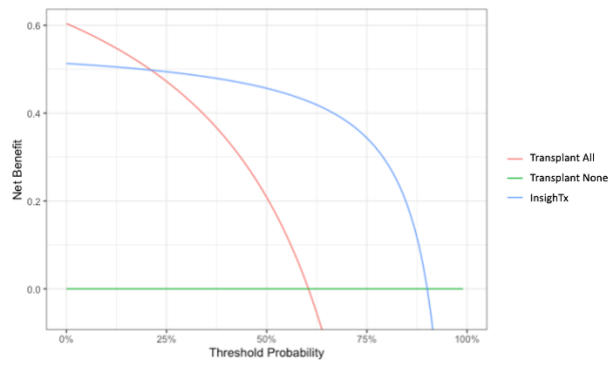

b.

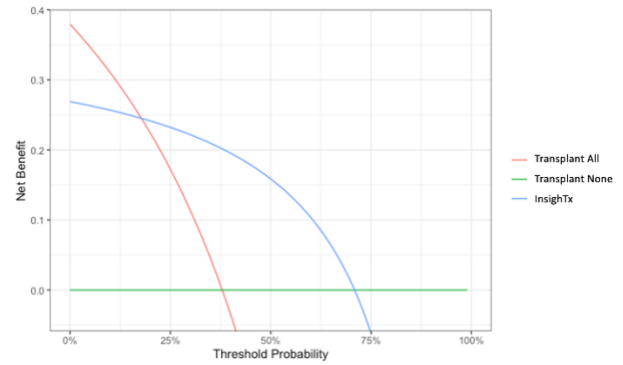

**Supplementary Figure 2: Net Benefit of the InsighTx model.** Net benefit graphs of the InsighTx model (blue trace) compared to transplant 'all' (red trace) or 'none' (green trace) approaches to predict transplant suitability (a) or post-transplant extubation <72h (b). Source data are provided as a Source Data file.

**Supplementary Table 1:** Performance (AUROC) of donor and/or recipient models that predict time to extubation in transplanted patients

| <b>Model</b>                         | <b>AUROC (SD)</b> |
|--------------------------------------|-------------------|
| <i>InsignTx + Recipient Features</i> | 79 (4)            |
| <i>InsignTx</i>                      | 73 (8)            |
| <i>Recipient Features Only</i>       | 69 (6)            |
| <i>p-value</i> <sup>1</sup>          | 0.17              |
| <i>p-value</i> <sup>2</sup>          | 0.01              |

Legend: 1: p-value for “InsignTx + Recipient Features” vs. “InsignTx”; 2: p-value for “InsignTx + Recipient Features” vs. “Recipient Features”; AUROC=area under receiver operating characteristic curve (%); SD=standard deviation. A detailed description of the p-value calculations can be found in the Methods.

**Supplementary Table 2:** Recipient and donor characteristics for InsignTx model assessment

|                              | Study Cases |
|------------------------------|-------------|
| Date Range                   | 2008-2020   |
| Number of Cases              | 20          |
| Mean Age (SD) – Years        |             |
| <i>Donor</i>                 | 45 (16)     |
| <i>Recipient</i>             | 57 (12)     |
| Male Sex (%)                 |             |
| <i>Donor</i>                 | 13 (65%)    |
| <i>Recipient</i>             | 12 (60%)    |
| Donor Type DBD (%)           | 10 (50%)    |
| Recipient Status (%)         |             |
| 1                            | 6 (30%)     |
| 2                            | 10 (50%)    |
| 3                            | 4 (20%)     |
| Recipient Disease (%)        |             |
| <i>Emphysema/COPD</i>        | 6 (30%)     |
| <i>Cystic Fibrosis</i>       | 2 (10%)     |
| <i>PF/ILD/UIP/NSIP</i>       | 10 (50%)    |
| <i>Other</i>                 | 2 (10%)     |
| EVLP Outcome                 |             |
| <i>Transplanted (%)</i>      | 8 (40%)     |
| <i>Declined (%)</i>          | 12 (60%)    |
| Transplant Outcome           |             |
| <i>Extubated &lt;72h (%)</i> | 3 (38%)     |
| <i>PGD 3 at 72h (%)</i>      | 2 (25%)     |
| <i>ICU LOS [IQR] - Days</i>  | 5 [3-7]     |

Legend: SD=standard deviation; DBD=donation after brain death; EVLP=ex vivo lung perfusion; PGD=primary graft dysfunction; ICU=intensive care unit; LOS=length of stay; IQR=interquartile range; PF=pulmonary fibrosis; ILD=interstitial lung disease; UIP=usual interstitial pneumonia; NSIP=nonspecific interstitial pneumonia; COPD=chronic obstructive pulmonary disease.

**Supplementary Table 3:** Summary of the theoretical impact of InsignTx on organ utilization and impression

| Historical Outcome                       | Predicted Outcome                        | No. Decisions | InsignTx vs. SOC              |                                     |
|------------------------------------------|------------------------------------------|---------------|-------------------------------|-------------------------------------|
|                                          |                                          |               | ΔTransplant Decisions         | ΔClinical Impression of Donor Lung† |
| <i>Extubated &lt;72h Post-Transplant</i> | <i>Extubated &lt;72h Post-Transplant</i> | 45            | +7%<br>(+3 decisions to Tx)   | +1.0                                |
| <i>Unsuitable for Transplant</i>         | <i>Unsuitable for Transplant</i>         | 45            | -4%<br>(-2 decisions to Tx)   | -1.0                                |
| <i>Extubated ≥72h Post-Transplant</i>    | <i>Extubated ≥72h Post-Transplant</i>    | 75            | -13%<br>(-10 decisions to Tx) | 0                                   |
| <i>Unsuitable for Transplant</i>         | <i>Extubated &lt;72h Post-Transplant</i> | 135           | +13%<br>(+18 decisions to Tx) | +0.5                                |

† Assessors were asked to rank the overall impression of a donor lung from poor (0) to excellent (10). Shown are the changes in clinical impression for suitable and unsuitable donor lungs when the InsignTx model was available. Legend: SOC=standard of care; EVLP=ex vivo lung perfusion.

**Supplementary Table 4:** Summary of the theoretical transplantation rates (%) by EVLP experience† with (+) and without (-) InsignTx

| EVLP Experience | Unsuitable Donor Lungs |            | Suitable Donor Lungs |            |
|-----------------|------------------------|------------|----------------------|------------|
|                 | - InsignTx             | + InsignTx | - InsignTx           | + InsignTx |
| 100+            | 74%                    | 66%        | 54%                  | 70%        |
| <100            | 55%                    | 38%        | 43%                  | 54%        |

† : experience defined as the number of clinical EVLP cases performed by the assessor – a threshold of 100 cases was used.

**Supplementary Table 5:** Summary of source data acquisition for the InsignTx model

| Input Feature                                         | Data Source                                                                   | Data Recording               | Acquisition Time | Data Notes                                            |
|-------------------------------------------------------|-------------------------------------------------------------------------------|------------------------------|------------------|-------------------------------------------------------|
| Donor characteristics                                 | Patient charts                                                                | Text                         | Instantaneous    | N/A                                                   |
| Physiological (i.e., compliance, airway pressure)     | ICU grade ventilator (i.e., Maquet Servo-i or similar)                        | Continuous monitoring        | Instantaneous    | Recorded hourly                                       |
| Physiological (i.e., PA and LA pressure)              | Pressure monitor (i.e., Philips IntelliVue MX450)                             | Continuous monitoring        | Instantaneous    | Recorded hourly                                       |
| Physiological (i.e., gas exchange)                    | Perfusate sampling and ABG analysis (i.e., Siemens Rapid-point or similar)    | As samples are drawn         | <5 minutes       | Samples drawn during hourly assessment or as needed   |
| Biochemical (i.e., acid base chemistry, electrolytes) | Perfusate sampling and ABG analysis (i.e., Siemens Rapid-point or similar)    | As samples are drawn         | <5 minutes       | Samples drawn during hourly assessment or as needed   |
| Biological (i.e., cytokines)                          | Perfusate sampling and ELISA-based analysis (i.e., SQI TORdx LUNG or similar) | Batched sampling during EVLP | <40 minutes      | Samples drawn during EVLP to capture cytokine profile |
| Edema (i.e., perfusate loss and volume exchanges)     | Perfusate reservoir                                                           | Manual recording             | Instantaneous    | Annotated hourly by Organ Perfusion Specialists       |

Legend: LA=left atrial; PA=pulmonary artery; ABG=arterial blood gas

**Supplementary Table 6:** All EVLP features used in the InsignTx model

| Donor                      | Physiological                            | Biochemical | Biological   |
|----------------------------|------------------------------------------|-------------|--------------|
| Age                        | $\Delta pO_2$                            | $Ca^{2+}$   | IL-10        |
| Sex                        | $\Delta pCO_2$                           | $Cl^-$      | IL-1 $\beta$ |
| BMI                        | Dynamic Compliance                       | $K^+$       | IL-6         |
| Donor Type<br>(DBD vs DCD) | Static Compliance                        | $Na^+$      | IL-8         |
|                            | PA & LA Pressure                         | Base Excess |              |
|                            | Vascular Resistance                      | $HCO_3^-$   |              |
|                            | Airway Pressure<br>(Peak, Mean, Plateau) | pH          |              |
|                            | PEEP                                     | Glucose     |              |
|                            | Volume of perfusate<br>loss and exchange | Lactate     |              |

Legend:  $\Delta pO_2$ =change in oxygen partial pressure;  $\Delta pCO_2$ =change in carbon dioxide partial pressure; LA=left atrial; PA=pulmonary artery; IL-8=interleukin-8; IL-6=interleukin-6; IL-10=interleukin-10; IL-1 $\beta$ =interleukin-1beta; BMI=body mass index; DBD=donation after brain death; DCD=donation after cardiac death; PEEP=positive end-expiratory pressure.



**Supplementary Table 7:** Summary of quantitative data derived from EVLP assessment features†

| Parameter                                                  | N Data Points | Median [IQR]         |
|------------------------------------------------------------|---------------|----------------------|
| <b>Physiological</b>                                       |               |                      |
| $\Delta pO_2$ (mmHg)                                       | 2,720         | 437 [377 – 485]      |
| $\Delta pCO_2$ (mmHg)                                      | 2,442         | -6 [(-7) – (-4)]     |
| Dynamic Compliance (mL/cmH <sub>2</sub> O)                 | 2,654         | 73 [53 – 89]         |
| Static Compliance (mL/cmH <sub>2</sub> O)                  | 2,604         | 114 [82 – 147]       |
| LA Pressure (mmHg)                                         | 6,010         | 4 [4 – 5]            |
| PA Pressure (mmHg)                                         | 6,011         | 7 [6 – 8]            |
| Pulmonary Vascular Resistance (dynes/sec/cm <sup>5</sup> ) | 5,654         | 175 [103 – 296]      |
| Peak Pressure (cmH <sub>2</sub> O)                         | 5,354         | 13 [12 – 15]         |
| Plateau Pressure (cmH <sub>2</sub> O)                      | 2,655         | 11 [10 – 13]         |
| Mean Pressure (cmH <sub>2</sub> O)                         | 5,327         | 7 [7 – 8]            |
| PEEP (cmH <sub>2</sub> O)                                  | 6,733         | 5 [5 – 5]            |
| Perfusate addition (mL)                                    | 2,601         | 250 [250 – 500]      |
| Perfusate removal (mL)                                     | 1,795         | 250 [125 – 250]      |
| Edema (perfusate loss) (mL)                                | 1,481         | 90 [50 – 175]        |
| <b>Biochemical</b>                                         |               |                      |
| Ca <sup>2+</sup> (mmol/L)                                  | 2,474         | 0.87 [0.84 – 0.91]   |
| Cl <sup>-</sup> (mmol/L)                                   | 2,610         | 125 [123 – 127]      |
| K <sup>+</sup> (mmol/L)                                    | 2,685         | 4.3 [4.1 – 4.6]      |
| Na <sup>+</sup> (mmol/L)                                   | 2,585         | 150 [148 – 153]      |
| Base Excess (mmol/L)                                       | 2,638         | -24 [(-27) – (-21)]  |
| HCO <sub>3</sub> <sup>-</sup> (mmol/L)                     | 2,632         | 5.9 [4.3 – 7.6]      |
| pH                                                         | 2,444         | 7.08 [6.95 – 7.19]   |
| Glucose (mmol/L)                                           | 3,639         | 7.5 [6.0 – 8.6]      |
| Lactate (mmol/L)                                           | 2,186         | 5.8 [3.8 – 8.3]      |
| <b>Biological</b>                                          |               |                      |
| IL-6 (pg/mL)                                               | 1,261         | 4,758 [707 – 18,850] |
| IL-8 (pg/mL)                                               | 1,259         | 467 [119 – 2,932]    |
| IL-1 $\beta$ (pg/mL)                                       | 766           | 5.4 [1.7 – 15.0]     |
| IL-10 (pg/mL)                                              | 756           | 76.1 [12.8 – 172.8]  |

Legend: †: median proportion of cases with a missing parameter was 15%;  $\Delta pO_2$ =change in oxygen partial pressure;  $\Delta pCO_2$ =change in carbon dioxide partial pressure; LA=left atrial; PA=pulmonary artery; IL-8=interleukin-8; IL-6=interleukin-6; IL-10=interleukin-10; IL-1 $\beta$ =interleukin-1beta; PEEP=positive end-expiratory pressure.

**Supplementary Table 8:** Transplant patient characteristics for InsignTx with recipient features model

|                                       |           |
|---------------------------------------|-----------|
| Number of Cases                       | 368       |
| Mean Age (SD) – Years                 | 55 (14)   |
| Sex (%)                               |           |
| Female                                | 135 (37%) |
| Male                                  | 233 (63%) |
| Mean BMI (SD)                         | 24 (5)    |
| Status at Assessment (%)              |           |
| 1                                     | 197 (53%) |
| 2                                     | 131 (36%) |
| 3                                     | 40 (11%)  |
| Status at Listing (%)                 |           |
| 1                                     | 197 (53%) |
| 2                                     | 130 (36%) |
| 3                                     | 41 (11%)  |
| Status at Admission (%)               |           |
| 1                                     | 116 (32%) |
| 2                                     | 139 (37%) |
| 3                                     | 113 (31%) |
| Indication for Transplant (%)         |           |
| <i>PF/ILD/UIP/NSIP</i>                | 161 (44%) |
| <i>Emphysema/COPD</i>                 | 131 (36%) |
| <i>Cystic Fibrosis</i>                | 43 (12%)  |
| <i>Primary pulmonary hypertension</i> | 15 (4%)   |
| <i>Retransplant</i>                   | 16 (4%)   |
| <i>Other</i>                          | 2 (<1%)   |

Legend: SD=standard deviation; BMI=body mass index; PF=pulmonary fibrosis; ILD=interstitial lung disease; UIP=usual interstitial pneumonia; NSIP=nonspecific interstitial pneumonia; COPD=chronic obstructive pulmonary disease.
